# Supplementary material for: Med12 is essential for early mouse development and for canonical Wnt and Wnt/PCP signaling
Source: Oxford University Press journal article supplement (doi:10.1242/dev.053660), 2010-07-14
Supplement: dev053660tables1.pdf [file dev053660tables1.pdf]

**Table S1. Primers used for quantitative RT-PCR**

| Gene         | Forward (5'-3')          | Reverse (5'-3')           |
|--------------|--------------------------|---------------------------|
| <i>Bmp4</i>  | AGATTGGCTCCCAAGAATCA     | GCCTCCTAGCAGGACTTGG       |
| <i>Dkk1</i>  | CCGTCTGCCTCCGATCAT       | GGACCAGAAGTGTCTTGCACAA    |
| <i>Eomes</i> | CCACTGGATGAGGCAGGAGATTTC | AGTCTTGGAAGGTTCAATCAAGTCC |
| <i>Fgf5</i>  | CGAGGAGTTTTTCAGCAACAA    | CGCGGACGCATAGGTATTAT      |
| <i>Gapdh</i> | TCAAGAAGGTGGTGAAGCAG     | ACCACCCTGTTGCTGTAGCC      |
| <i>Il2rg</i> | AATCCCCCATCAAGAATC       | GTAGTCTGGCTGCAGACTCTCA    |
| <i>Lef1</i>  | AGCCTGTTTATCCCATCACG     | TGAGGCTTCACGTGCATTAG      |
| <i>Nanog</i> | CCTCCATTCTGAACCTGAGC     | GCAATGGATGCTGGGATACT      |
| <i>Nefl</i>  | CCACTCTGCAAGCAAACAGA     | CCACTGGATGAGGCAGGAGATTTC  |
| <i>Nlgn3</i> | CTGTCTTTGGCTCTGGCATC     | AGAGCCACTTTGGATGATGG      |
| <i>Oct4</i>  | AGCTGCTGAAGCAGAAGAGG     | AGATGGTGGTCTGGCTGAAC      |
| <i>Rest</i>  | GTGCGAACTCACACAGGAGA     | AAGAGGTTTAGGCCCGTTGT      |
| <i>Rex1</i>  | CCTGCACACAGAAGAAAGCA     | CACTGATCCGCAAACACCT       |
| <i>Sox2</i>  | AGACCGTTTTTCGTGGTCTTG    | TATCAACCTGCATGGGCATT      |
| <i>T</i>     | CAGCTGTCTGGGAGCCTGG      | TGCTGCCTGTGAGTCATAAC      |
